# Supplementary material
Source: Springer Nature journal article supplement (https://www.springermedizin.de/resource/supplementary/13098_2014_348_MOESM7_ESM.pdf/9671136)

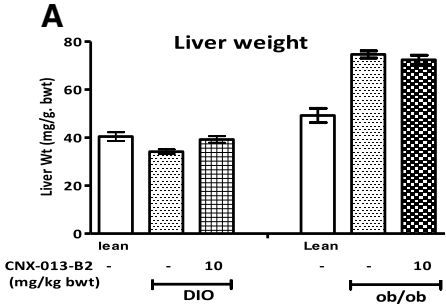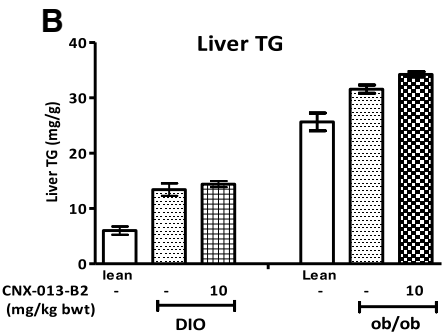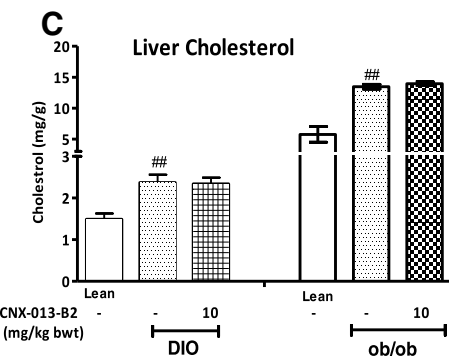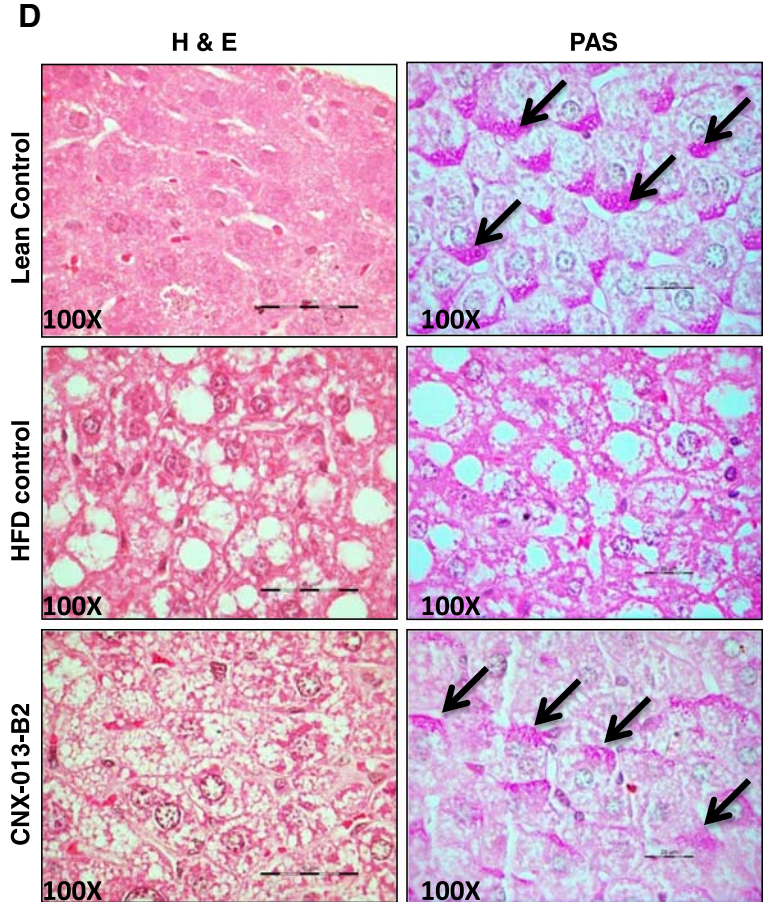

Supplement: MOESM7 [file 9671136]
